# Supplementary material for: Identification of Widespread Ultra-Edited Human RNAs
Source: PLoS Genet. 2011 Oct 20;7(10):e1002317. doi: 10.1371/journal.pgen.1002317 (PMC3197674; doi:10.1371/journal.pgen.1002317)
Supplement: Dataset S6 — A list of functions enriched in ultra-edited genes. The file contains enriched GO and UniProt terms, gene counts, gene names, and P-values for enrichment as obtained from DAVID (http://david.abcc.ncifcrf.gov/). The file also lists the ultra-edited genes that are related to stress response, apoptosis, and hematopoiesis. (XLS) [file pgen.1002317.s006.xls]

## Sheet: גיליון1
Functions enriched in ultra edited genes		Using DAVID (http://david.abcc.ncifcrf.gov/), Gene Ontology (http://www.geneontology.org/), UniProt (http://www.uniprot.org/)
Enriched GO terms (MF- molecular function, BP- biological process, CC- cellular component). Minimum three genes, maximal P-value 0.001.
Category	Term	Count	%	PValue	Genes	List Total	Pop Hits	Pop Total	Fold Enrichment	Bonferroni	Benjamini	FDR
GOTERM_MF_FAT	GO:0017076~purine nucleotide binding	67	16.3814	2.36946e-05	GNA13, ACOX1, SPG7, RAB9A, PRKAG1, ATL3, GNL3L, PI4K2B, ACSS2, PMS2L3, ACTR2, PRKAR2A, LONP1, LONP2, AGPS, TLK1, RAB6A, DOCK11, KIF2A, SRPK2, PDXK, CSNK1G1, LIMK2, ROCK2, PIK3C2A, SARS, PI4KA, RPS6KC1, UBE2I, MCM2, MARK3, GMPS, RFC2, NAV2, ADK, TOP3A, PCCA, RAB7A, GPN2, CHKA, PRKDC, MYO9A, CMPK1, DGKA, MAP3K2, ACSL4, ENTPD1, DCAKD, C9ORF103, MGC42105, ACACA, AARSD1, DOCK3, NDOR1, TUBA8, GSPT1, AT…	274	1918	12983	1.6552	0.0120819	0.0120819	0.0342388
GOTERM_MF_FAT	GO:0000166~nucleotide binding	75	18.3374	2.87082e-05	GNA13, ACOX1, SLC27A1, SPG7, RAB9A, PRKAG1, ATL3, GNL3L, PI4K2B, ACSS2, PMS2L3, ACTR2, PRKAR2A, LONP1, LONP2, AGPS, TLK1, RAB6A, RBM10, DOCK11, KIF2A, SRPK2, PDXK, CSNK1G1, LIMK2, ROCK2, PIK3C2A, SARS, PI4KA, RPS6KC1, UBE2I, CBR3, MCM2, MARK3, GMPS, SLTM, RFC2, NAV2, ADK, TOP3A, PCCA, GPN2, RAB7A, CHKA, PRKDC, MYO9A, CMPK1, DGKA, MAP3K2, SAFB, HNRNPC, SKIL, ACSL4, ENTPD1, DCAKD, C9ORF103, MGC4210…	274	2245	12983	1.58296	0.0146196	0.00733671	0.0414822
GOTERM_MF_FAT	GO:0032555~purine ribonucleotide binding	64	15.6479	4.20445e-05	GNA13, SPG7, RAB9A, PRKAG1, ATL3, GNL3L, PI4K2B, ACSS2, PMS2L3, ACTR2, PRKAR2A, LONP1, LONP2, TLK1, RAB6A, DOCK11, KIF2A, SRPK2, PDXK, CSNK1G1, LIMK2, ROCK2, PIK3C2A, SARS, PI4KA, RPS6KC1, UBE2I, MCM2, MARK3, GMPS, RFC2, NAV2, ADK, TOP3A, PCCA, RAB7A, GPN2, CHKA, PRKDC, MYO9A, CMPK1, DGKA, MAP3K2, ACSL4, ENTPD1, DCAKD, C9ORF103, MGC42105, ACACA, AARSD1, DOCK3, TUBA8, GSPT1, ATP2A2, GSK3B, DDX59, …	274	1836	12983	1.6517	0.0213383	0.00716398	0.0607472
GOTERM_MF_FAT	GO:0032553~ribonucleotide binding	64	15.6479	4.20445e-05	GNA13, SPG7, RAB9A, PRKAG1, ATL3, GNL3L, PI4K2B, ACSS2, PMS2L3, ACTR2, PRKAR2A, LONP1, LONP2, TLK1, RAB6A, DOCK11, KIF2A, SRPK2, PDXK, CSNK1G1, LIMK2, ROCK2, PIK3C2A, SARS, PI4KA, RPS6KC1, UBE2I, MCM2, MARK3, GMPS, RFC2, NAV2, ADK, TOP3A, PCCA, RAB7A, GPN2, CHKA, PRKDC, MYO9A, CMPK1, DGKA, MAP3K2, ACSL4, ENTPD1, DCAKD, C9ORF103, MGC42105, ACACA, AARSD1, DOCK3, TUBA8, GSPT1, ATP2A2, GSK3B, DDX59, …	274	1836	12983	1.6517	0.0213383	0.00716398	0.0607472
GOTERM_BP_FAT	GO:0043632~modification-dependent macromolecule catabolic process	28	6.84597	0.000130487	UBE3B, USP4, ZNRF1, SENP6, RNF125, LONP1, ZYG11A, MAP1LC3B, RABGEF1, RNF168, USP34, FBXL18, TBL1XR1, ZC3HC1, ANAPC5, FBXL20, HERC5, PCNP, UBR2, UBE2I, MAP1LC3B2, LRRC29, MID1, BRAP, BRCA1, CCNB1, TRIM33, TBL1X	294	574	13528	2.24457	0.168171	0.168171	0.214987
GOTERM_BP_FAT	GO:0019941~modification-dependent protein catabolic process	28	6.84597	0.000130487	UBE3B, USP4, ZNRF1, SENP6, RNF125, LONP1, ZYG11A, MAP1LC3B, RABGEF1, RNF168, USP34, FBXL18, TBL1XR1, ZC3HC1, ANAPC5, FBXL20, HERC5, PCNP, UBR2, UBE2I, MAP1LC3B2, LRRC29, MID1, BRAP, BRCA1, CCNB1, TRIM33, TBL1X	294	574	13528	2.24457	0.168171	0.168171	0.214987
GOTERM_CC_FAT	GO:0043228~non-membrane-bounded organelle	79	19.3154	0.000175252	FOXK1, HINT1, ARID4B, GNL3L, ACSS2, FAM83D, ACTR2, LONP1, MAK16, H2AFV, MAP1LC3B, HOMER3, LRRFIP1, KIF2A, STAG1, SRPK2, TBL1XR1, ANKS1B, SP100, ROCK2, POLR1D, FLOT1, TANC1, RPS6KC1, PDE4D, TOPBP1, UBE2I, MAP1LC3B2, MCM2, ZFR, RSL1D1, SUZ12, EML2, TNS3, EP300, RFC2, NAV2, CLIC4, TOP3A, NOL10, SH3KBP1, CLIP2, NUP43, SHROOM4, NHP2L1, BBS9, SLC38A6, HAUS1, ERI1, CEP164, KEAP1, NR3C1, MYO9A, TPM4, SOR…	264	2596	12782	1.47339	0.0552044	0.0552044	0.236677
GOTERM_CC_FAT	GO:0043232~intracellular non-membrane-bounded organelle	79	19.3154	0.000175252	FOXK1, HINT1, ARID4B, GNL3L, ACSS2, FAM83D, ACTR2, LONP1, MAK16, H2AFV, MAP1LC3B, HOMER3, LRRFIP1, KIF2A, STAG1, SRPK2, TBL1XR1, ANKS1B, SP100, ROCK2, POLR1D, FLOT1, TANC1, RPS6KC1, PDE4D, TOPBP1, UBE2I, MAP1LC3B2, MCM2, ZFR, RSL1D1, SUZ12, EML2, TNS3, EP300, RFC2, NAV2, CLIC4, TOP3A, NOL10, SH3KBP1, CLIP2, NUP43, SHROOM4, NHP2L1, BBS9, SLC38A6, HAUS1, ERI1, CEP164, KEAP1, NR3C1, MYO9A, TPM4, SOR…	264	2596	12782	1.47339	0.0552044	0.0552044	0.236677
GOTERM_MF_FAT	GO:0030554~adenyl nucleotide binding	55	13.4474	0.000180252	ACOX1, SPG7, PRKAG1, PI4K2B, ACSS2, PMS2L3, ACTR2, LONP1, PRKAR2A, LONP2, AGPS, TLK1, KIF2A, SRPK2, PDXK, LIMK2, CSNK1G1, PIK3C2A, ROCK2, SARS, PI4KA, RPS6KC1, UBE2I, MCM2, MARK3, GMPS, NAV2, RFC2, ADK, TOP3A, PCCA, CHKA, PRKDC, MYO9A, CMPK1, DGKA, MAP3K2, ACSL4, ENTPD1, DCAKD, C9ORF103, MGC42105, ACACA, AARSD1, NDOR1, ATP2A2, GSK3B, DDX59, ABCC3, TEP1, ABCC1, MYH14, FUK, FPGS, PC	274	1577	12983	1.65255	0.0883302	0.0228541	0.260191
GOTERM_BP_FAT	GO:0030163~protein catabolic process	29	7.09046	0.000203663	SPG7, UBE3B, USP4, ZNRF1, SENP6, RNF125, LONP1, ZYG11A, MAP1LC3B, RABGEF1, RNF168, USP34, FBXL18, TBL1XR1, ZC3HC1, ANAPC5, FBXL20, HERC5, PCNP, UBR2, UBE2I, LRRC29, MAP1LC3B2, MID1, BRCA1, BRAP, CCNB1, TRIM33, TBL1X	294	622	13528	2.14533	0.249787	0.133852	0.335361
GOTERM_MF_FAT	GO:0001883~purine nucleoside binding	55	13.4474	0.000264421	ACOX1, SPG7, PRKAG1, PI4K2B, ACSS2, PMS2L3, ACTR2, LONP1, PRKAR2A, LONP2, AGPS, TLK1, KIF2A, SRPK2, PDXK, LIMK2, CSNK1G1, PIK3C2A, ROCK2, SARS, PI4KA, RPS6KC1, UBE2I, MCM2, MARK3, GMPS, NAV2, RFC2, ADK, TOP3A, PCCA, CHKA, PRKDC, MYO9A, CMPK1, DGKA, MAP3K2, ACSL4, ENTPD1, DCAKD, C9ORF103, MGC42105, ACACA, AARSD1, NDOR1, ATP2A2, GSK3B, DDX59, ABCC3, TEP1, ABCC1, MYH14, FUK, FPGS, PC	274	1601	12983	1.62778	0.126866	0.0267683	0.381472
GOTERM_BP_FAT	GO:0051603~proteolysis involved in cellular protein catabolic process	28	6.84597	0.000267205	UBE3B, USP4, ZNRF1, SENP6, RNF125, LONP1, ZYG11A, MAP1LC3B, RABGEF1, RNF168, USP34, FBXL18, TBL1XR1, ZC3HC1, ANAPC5, FBXL20, HERC5, PCNP, UBR2, UBE2I, MAP1LC3B2, LRRC29, MID1, BRAP, BRCA1, CCNB1, TRIM33, TBL1X	294	600	13528	2.1473	0.314137	0.118114	0.439775
GOTERM_MF_FAT	GO:0019899~enzyme binding	25	6.11247	0.000283832	HINT1, PRKAG1, RIMS2, LONP1, LONP2, SORBS1, NUDT21, RAPGEF6, PAFAH1B1, SKIL, SUPT5H, DOCK11, FGD3, SP100, MAGI2, ZC3HC1, STRN4, UBE2I, GMPS, DOCK3, BRCA1, GSK3B, RAP1A, SYTL3, ZFHX3	274	523	12983	2.26497	0.13552	0.0239789	0.409423
GOTERM_BP_FAT	GO:0044257~cellular protein catabolic process	28	6.84597	0.000288403	UBE3B, USP4, ZNRF1, SENP6, RNF125, LONP1, ZYG11A, MAP1LC3B, RABGEF1, RNF168, USP34, FBXL18, TBL1XR1, ZC3HC1, ANAPC5, FBXL20, HERC5, PCNP, UBR2, UBE2I, MAP1LC3B2, LRRC29, MID1, BRAP, BRCA1, CCNB1, TRIM33, TBL1X	294	603	13528	2.13662	0.334353	0.0967436	0.474585
GOTERM_CC_FAT	GO:0031981~nuclear lumen	50	12.2249	0.00030234	FOXK1, DBF4, GNL3L, ACSS2, MAK16, SUPT5H, ANKS1B, TBL1XR1, SRPK2, SP100, ANAPC5, POLR1D, TOPBP1, UBE2I, MCM2, MED13, ELL3, ZFR, SUZ12, RSL1D1, TNS3, EP300, NAV2, RFC2, SH3KBP1, NOL10, TOP3A, CPSF3L, ING5, NHP2L1, LIN9, MGMT, PRKDC, ERI1, KEAP1, NR3C1, SAFB, NUDT21, TFDP2, TCEA1, SIRT1, APPL2, BRCA1, FXR1, CCNB1, RSRC1, WHSC1L1, TEP1, TBL1X, ZFHX3	264	1450	12782	1.66954	0.0933265	0.047806	0.407983
GOTERM_MF_FAT	GO:0001882~nucleoside binding	55	13.4474	0.0003138	ACOX1, SPG7, PRKAG1, PI4K2B, ACSS2, PMS2L3, ACTR2, LONP1, PRKAR2A, LONP2, AGPS, TLK1, KIF2A, SRPK2, PDXK, LIMK2, CSNK1G1, PIK3C2A, ROCK2, SARS, PI4KA, RPS6KC1, UBE2I, MCM2, MARK3, GMPS, NAV2, RFC2, ADK, TOP3A, PCCA, CHKA, PRKDC, MYO9A, CMPK1, DGKA, MAP3K2, ACSL4, ENTPD1, DCAKD, C9ORF103, MGC42105, ACACA, AARSD1, NDOR1, ATP2A2, GSK3B, DDX59, ABCC3, TEP1, ABCC1, MYH14, FUK, FPGS, PC	274	1612	12983	1.61667	0.148712	0.0227381	0.452559
GOTERM_MF_FAT	GO:0043169~cation binding	116	28.3619	0.00031516	ATP1B3, DBF4, ZNF782, ITSN2, NFXL1, ZNRF1, CLYBL, RABGEF1, MLL3, RBM10, ZC3HC1, PDXK, SPARCL1, ROCK2, ZNF440, ZNF814, UBR2, PDE4D, BRAP, SUZ12, DCLRE1C, TNS3, EP300, TRIM33, ZNF431, PPP5C, CHKA, ARFGAP3, TSHZ2, ZNF76, SLC38A6, CACNB1, HFE, CACNB2, RIMS2, MYO9A, ZNF225, RNF168, ENTPD1, FGD3, ZNF69, MGC42105, ACACA, BRCA1, EPS15, TET3, ATP2A2, DDX59, SYTL3, ZFHX3, GPATCH8, PC, SPG7, ZNF83, ARSD, SE…	274	4179	12983	1.31526	0.149306	0.0200099	0.454517
GOTERM_MF_FAT	GO:0032559~adenyl ribonucleotide binding	52	12.7139	0.000319495	SPG7, PRKAG1, PI4K2B, ACSS2, PMS2L3, ACTR2, LONP1, PRKAR2A, LONP2, TLK1, KIF2A, SRPK2, PDXK, LIMK2, CSNK1G1, PIK3C2A, ROCK2, SARS, PI4KA, RPS6KC1, UBE2I, MCM2, MARK3, GMPS, NAV2, RFC2, ADK, TOP3A, PCCA, CHKA, PRKDC, MYO9A, CMPK1, DGKA, MAP3K2, ACSL4, ENTPD1, DCAKD, C9ORF103, MGC42105, ACACA, AARSD1, ATP2A2, GSK3B, DDX59, ABCC3, TEP1, ABCC1, MYH14, FUK, FPGS, PC	274	1497	12983	1.64591	0.151196	0.0180492	0.460755
GOTERM_MF_FAT	GO:0043167~ion binding	117	28.6064	0.000376496	ATP1B3, DBF4, ZNF782, ITSN2, NFXL1, ZNRF1, CLYBL, RABGEF1, MLL3, RBM10, ZC3HC1, PDXK, SPARCL1, ROCK2, ZNF440, ZNF814, UBR2, PDE4D, BRAP, SUZ12, DCLRE1C, TNS3, EP300, TRIM33, ZNF431, PPP5C, CHKA, ARFGAP3, TSHZ2, ZNF76, SLC38A6, CACNB1, HFE, CACNB2, RIMS2, MYO9A, ZNF225, RNF168, ENTPD1, FGD3, ZNF69, MGC42105, ACACA, BRCA1, EPS15, TET3, ATP2A2, DDX59, SYTL3, ZFHX3, GPATCH8, PC, SPG7, ZNF83, ARSD, SE…	274	4241	12983	1.3072	0.175665	0.0191325	0.54275
GOTERM_CC_FAT	GO:0015630~microtubule cytoskeleton	25	6.11247	0.000415543	BBS9, HAUS1, CEP164, KEAP1, FAM83D, MAP1LC3B, NUDT21, PAFAH1B1, KIF2A, TBL1XR1, ROCK2, CEP135, FLOT1, TOPBP1, PDE4D, MAP1LC3B2, MID1, TUBGCP2, BRCA1, CCNB1, EML2, TUBA8, INVS, CLIP2, TBL1X	264	549	12782	2.20477	0.12599	0.0438954	0.560345
GOTERM_MF_FAT	GO:0046872~metal ion binding	114	27.8729	0.000525954	ATP1B3, DBF4, ZNF782, ITSN2, NFXL1, ZNRF1, CLYBL, RABGEF1, MLL3, RBM10, ZC3HC1, PDXK, SPARCL1, ROCK2, ZNF440, ZNF814, UBR2, PDE4D, BRAP, SUZ12, DCLRE1C, TNS3, EP300, TRIM33, ZNF431, PPP5C, ARFGAP3, TSHZ2, ZNF76, SLC38A6, CACNB1, HFE, CACNB2, RIMS2, MYO9A, ZNF225, RNF168, ENTPD1, FGD3, ZNF69, MGC42105, ACACA, BRCA1, EPS15, TET3, ATP2A2, DDX59, SYTL3, ZFHX3, GPATCH8, PC, SPG7, ZNF83, ARSD, SEC24A, …	274	4140	12983	1.30476	0.236533	0.0242365	0.757445
GOTERM_CC_FAT	GO:0019898~extrinsic to membrane	23	5.62347	0.000565944	SEC23A, GNA13, DLGAP1, SEC31B, MAGI2, ROCK2, FLOT2, STRN4, FLOT1, EPS15L1, GIPC1, ZNRF1, RIMS2, APPL2, KCNIP4, GCC2, INVS, SH3KBP1, RGS7, SYTL3, GOLGA4, UBXN4, VPS39	264	494	12782	2.25422	0.16758	0.044819	0.762438
GOTERM_CC_FAT	GO:0005813~centrosome	14	3.42298	0.000750832	ROCK2, CEP135, BBS9, FLOT1, HAUS1, CEP164, PDE4D, TOPBP1, KEAP1, TUBGCP2, CCNB1, NUDT21, PAFAH1B1, KIF2A	264	224	12782	3.02604	0.216012	0.0475067	1.01035
GOTERM_CC_FAT	GO:0005815~microtubule organizing center	15	3.66748	0.000758255	ROCK2, CEP135, BBS9, FLOT1, HAUS1, KEAP1, CEP164, PDE4D, TOPBP1, TUBGCP2, BRCA1, CCNB1, NUDT21, PAFAH1B1, KIF2A	264	253	12782	2.87055	0.217896	0.0401337	1.02029
GOTERM_MF_FAT	GO:0005524~ATP binding	50	12.2249	0.000777748	SPG7, PI4K2B, ACSS2, PMS2L3, ACTR2, LONP1, LONP2, TLK1, KIF2A, SRPK2, PDXK, LIMK2, CSNK1G1, PIK3C2A, ROCK2, SARS, PI4KA, RPS6KC1, UBE2I, MCM2, MARK3, GMPS, NAV2, RFC2, ADK, TOP3A, PCCA, CHKA, PRKDC, MYO9A, CMPK1, DGKA, MAP3K2, ENTPD1, ACSL4, DCAKD, C9ORF103, MGC42105, ACACA, AARSD1, ATP2A2, GSK3B, DDX59, ABCC3, TEP1, ABCC1, MYH14, FUK, FPGS, PC	274	1477	12983	1.60404	0.329103	0.0327146	1.11817
Enriched terms from SP_PIR and UP_SEQ. Minimum three genes, maximal P-value 0.001.
Category	Term	Count	%	PValue	Genes	List Total	Pop Hits	Pop Total	Fold Enrichment	Bonferroni	Benjamini	FDR
SP_PIR_KEYWORDS	phosphoprotein	230	56.2347	1.2108e-15	SEC31B, VPS54, ITSN2, ZNRF1, MAK16, AGPS, HOMER3, SFRS8, RAPGEF6, TLK1, GLE1, SUPT5H, STAG1, MAGI2, ZC3HC1, C20ORF117, ANAPC5, C6ORF35, PTPRG, ROCK2, STRN4, TANC1, MED13, MARK3, BRAP, GCC2, FRY, DCLRE1C, BTF3L4, NAV2, ABCA11P, GRAP2, NUP43, BTN3A2, CACNB1, CACNB2, CEP164, RIMS2, MYO9A, STX12, TMEM127, ZNF225, BAI3, KIAA1683, DVL3, MGC42105, ACACA, PCNP, AARSD1, FXR1, APOL1, RABEP1, ATP2A2, RGS7, …	401	7263	19235	1.51901	4.20108e-13	4.20108e-13	1.66533e-12
UP_SEQ_FEATURE	splice variant	217	53.0562	4.7928e-10	TMEM19, SEC31B, VPS54, ITSN2, ZNRF1, C1ORF109, HOMER3, RAPGEF6, TLK1, GLE1, SUPT5H, FHAD1, MAGI2, ZC3HC1, C20ORF117, ANAPC5, PTPRG, TANC1, UBR2, MIIP, MARK3, GCC2, DCAF4, DCLRE1C, C1ORF84, NAV2, RFC2, CPSF3L, CHKA, ZNF76, CACNB1, CACNB2, HFE, CEP164, RIMS2, MYO9A, C19ORF28, KIAA1683, DCAKD, ZNF69, OSBPL2, ACACA, PCNP, PIBF1, AARSD1, C10ORF76, FXR1, APOL1, RABEP1, ATP2A2, HOPX, RGS7, PARP6, FUK, S…	400	7458	19113	1.39029	5.84722e-07	5.84722e-07	7.76431e-07
SP_PIR_KEYWORDS	alternative splicing	216	52.8117	9.50726e-10	TMEM19, SEC31B, VPS54, ITSN2, ZNRF1, C1ORF109, HOMER3, RAPGEF6, TLK1, GLE1, SUPT5H, FHAD1, MAGI2, ZC3HC1, C20ORF117, ANAPC5, PTPRG, TANC1, UBR2, MIIP, MARK3, GCC2, DCAF4, DCLRE1C, C1ORF84, NAV2, RFC2, CPSF3L, CHKA, ZNF76, CACNB1, CACNB2, HFE, CEP164, RIMS2, MYO9A, C19ORF28, KIAA1683, DCAKD, ZNF69, OSBPL2, PCNP, PIBF1, AARSD1, C10ORF76, FXR1, APOL1, RABEP1, ATP2A2, HOPX, RGS7, PARP6, FUK, SYTL3, Z…	401	7488	19235	1.38368	3.2705e-07	1.63525e-07	1.29695e-06
SP_PIR_KEYWORDS	acetylation	90	22.0049	1.78171e-06	ACOX1, FOXK1, PRKAG1, HINT1, COPS3, ATL3, GNL3L, EPS15L1, ACSS2, PSPH, OGDH, CANX, ACTR2, SLC1A5, PRKAR2A, MAK16, AGPS, H2AFV, SFRS8, RABGEF1, DNAJC5, RAB6A, SUPT5H, RBM10, NQO1, MLL3, STAG1, TBL1XR1, SP100, PDXK, ZC3HC1, POGZ, PIK3C2A, POLR1D, SARS, STRN4, YTHDF2, TOPBP1, UBE2I, MAPK1IP1L, MCM2, ZFR, GMPS, RSL1D1, SLTM, EIF4G3, EP300, TRIM33, RFC2, CLIC4, ADK, LCLAT1, OSBPL11, JMJD1C, GRAP2, PPP…	401	2635	19235	1.63836	0.000612722	0.000204282	0.00243052
SP_PIR_KEYWORDS	ligase	20	4.88998	2.32376e-05	SLC27A1, UBE3B, SARS, HERC5, ACACA, UBE2I, UBR2, MID1, ACSS2, ZNRF1, GMPS, BRCA1, BRAP, RNF125, TRIM33, RNF168, FPGS, ACSL4, PCCA, PC	401	305	19235	3.14542	0.00796197	0.00199646	0.0316953
SP_PIR_KEYWORDS	ubl conjugation pathway	27	6.60147	2.59049e-05	UBE3B, USP4, ZNRF1, SENP6, RNF125, ZYG11A, DCAF10, MAP1LC3B, RABGEF1, RNF168, USP34, FBXL18, TBL1XR1, ZC3HC1, ANAPC5, FBXL20, HERC5, UBR2, UBE2I, MAP1LC3B2, LRRC29, MID1, BRAP, BRCA1, DCAF4, TRIM33, TBL1X	401	509	19235	2.54445	0.00887182	0.00178069	0.0353327
UP_SEQ_FEATURE	compositionally biased region:Ser-rich	24	5.86797	3.35699e-05	ARFGAP3, C10ORF47, C6ORF35, BDP1, ARID4B, TANC1, ATXN7L1, MED13, ANKHD1, DOCK3, FAM83D, CLEC16A, R3HDM2, C19ORF55, DCAF10, NAV2, GTF2IRD1, ANKRD11, ASH1L, REXO1, RAPGEF6, CLIP2, GREB1L, GPATCH8	400	425	19113	2.69831	0.0401286	0.0202697	0.0543691
SP_PIR_KEYWORDS	coiled coil	69	16.8704	4.23376e-05	VPS54, ARID4B, ATL3, EPS15L1, GNL3L, ITSN2, NFXL1, CBFA2T2, HOMER3, RABGEF1, TLK1, LRRFIP1, GLE1, MLL3, GOLGA4, FHAD1, KIF2A, SP100, POGZ, ROCK2, STRN4, STAP2, KTN1, UBR2, BRAP, GCC2, RSL1D1, SLTM, EIF4G3, RALGAPA1, TRIM33, NAV2, NOL10, SH3KBP1, CLIP2, UBAP2, BTN3A2, SRGAP1, TSHZ2, ARFGAP3, SHROOM4, LIN9, FAM193A, BDP1, HAUS1, LRBA, CEP164, MYO9A, TPM4, STX12, OSBPL1A, DTNB, REXO1, PAFAH1B1, SKIL…	401	2019	19235	1.63931	0.0144589	0.00242446	0.0577399
SP_PIR_KEYWORDS	nucleotide-binding	60	14.6699	5.12668e-05	GNA13, SLC27A1, SPG7, RAB9A, ATL3, GNL3L, PI4K2B, ACSS2, ACTR2, LONP1, PRKAR2A, LONP2, TLK1, RAB6A, KIF2A, SRPK2, PDXK, LIMK2, CSNK1G1, ROCK2, PIK3C2A, SARS, PI4KA, RPS6KC1, UBE2I, MCM2, MARK3, GMPS, RFC2, NAV2, ADK, TOP3A, PCCA, RAB7A, GPN2, CHKA, PRKDC, MYO9A, CMPK1, DGKA, MAP3K2, ACSL4, ENTPD1, DCAKD, C9ORF103, MGC42105, ACACA, TUBA8, GSPT1, ATP2A2, GSK3B, DDX59, ABCC3, TEP1, RAP1A, ABCC1, MYH…	401	1686	19235	1.70703	0.0174816	0.00251629	0.0699136
SP_PIR_KEYWORDS	atp-binding	48	11.7359	0.000237598	CHKA, SPG7, PRKDC, PI4K2B, ACSS2, MYO9A, CMPK1, DGKA, ACTR2, LONP1, LONP2, MAP3K2, TLK1, ACSL4, ENTPD1, KIF2A, DCAKD, SRPK2, PDXK, C9ORF103, LIMK2, CSNK1G1, ROCK2, PIK3C2A, SARS, MGC42105, PI4KA, ACACA, RPS6KC1, UBE2I, MCM2, MARK3, GMPS, ATP2A2, RFC2, NAV2, GSK3B, ADK, DDX59, ABCC3, TOP3A, TEP1, ABCC1, MYH14, FUK, FPGS, PCCA, PC	401	1326	19235	1.73638	0.0784916	0.0101659	0.323636
SP_PIR_KEYWORDS	nucleus	119	29.0954	0.000400774	CTDSPL, DBF4, ZNF782, MAK16, H2AFV, SFRS8, TLK1, GLE1, RBM10, MLL3, SUPT5H, STAG1, ZC3HC1, ZNF440, ZNF814, UBR2, TOPBP1, MED13, ELL3, AHR, RSL1D1, SUZ12, DCLRE1C, SLTM, RALGAPA1, EP300, TRIM33, NAV2, RFC2, GTF2IRD1, ZNF431, BIVM, NUP43, PPP5C, CPSF3L, TSHZ2, NHP2L1, ZNF76, CEP164, KEAP1, CMPK1, NIPBL, ZNF225, CENPC1, TFDP2, RNF168, NDRG1, HNRNPC, ZNF69, PCNP, BRCA1, R3HDM2, C1ORF61, HOPX, RFX2, S…	401	4283	19235	1.33274	0.128809	0.0152048	0.545338
UP_SEQ_FEATURE	repeat:WD 2	16	3.91198	0.000680834	TBL1XR1, SEC31B, STRN4, LRBA, EML2, CIAO1, DCAF4, DCAF10, WDR45L, NOL10, TEP1, PAFAH1B1, TBL1X, NUP43, MAPKBP1, WDR45	400	274	19113	2.79022	0.564343	0.24192	1.09726
UP_SEQ_FEATURE	repeat:WD 1	16	3.91198	0.000680834	TBL1XR1, SEC31B, STRN4, LRBA, EML2, CIAO1, DCAF4, DCAF10, WDR45L, NOL10, TEP1, PAFAH1B1, TBL1X, NUP43, MAPKBP1, WDR45	400	274	19113	2.79022	0.564343	0.24192	1.09726
SP_PIR_KEYWORDS	cell cycle	22	5.37897	0.000701811	PPP6C, ZC3HC1, ANAPC5, LIN9, DBF4, HAUS1, PCNP, CEP164, UBE2I, MCM2, APPL2, AHR, BRCA1, FAM83D, CCNB1, EP300, NIPBL, TFDP2, TLK1, PAFAH1B1, NUP43, STAG1	401	461	19235	2.28913	0.214557	0.0238615	0.953149
SP_PIR_KEYWORDS	wd repeat	16	3.91198	0.000706766	TBL1XR1, SEC31B, STRN4, LRBA, EML2, CIAO1, DCAF4, DCAF10, WDR45L, NOL10, TEP1, PAFAH1B1, TBL1X, NUP43, MAPKBP1, WDR45	401	276	19235	2.78073	0.215896	0.0218677	0.959849
SP_PIR_KEYWORDS	zinc	68	16.6259	0.000757208	ZNF83, SPG7, HINT1, DBF4, ZNF782, ZNRF1, NFXL1, CBFA2T2, PMS2L3, RABGEF1, MLL3, RBM10, ZNF33A, PDXK, ZC3HC1, ZNF547, SP100, LIMK2, ZNF542, POGZ, ROCK2, ZNF440, ZNF814, ZNF141, UBR2, MCM2, BRAP, ZNF335, SUZ12, TNS3, EP300, TRIM33, ASH1L, TOP3A, ZNF431, JMJD1C, MDM4, PPP5C, ING5, CPM, LIMS1, TSHZ2, ARFGAP3, ZNF558, SCAPER, ZNF76, MGMT, NR3C1, RIMS2, TIMP2, MYO9A, RNF125, DGKA, ZNF225, DTNB, RNF168,…	401	2189	19235	1.49008	0.229394	0.0214808	1.02803
Stress response-related genes
DCLRE1C	DNA cross-link repair 1C (PSO2 homolog, S. cerevisiae)
MGMT	O-6-methylguanine-DNA methyltransferase
SP100	SP100 nuclear antigen
BRCA1	breast cancer 1, early onset
CASP9	caspase 9, apoptosis-related cysteine peptidase
CEP164	centrosomal protein 164kDa
C16orf5	chromosome 16 open reading frame 5
C19orf62	chromosome 19 open reading frame 62
GSK3B	glycogen synthase kinase 3 beta
HFE	hemochromatosis
LONP1	lon peptidase 1, mitochondrial
MAP3K2	mitogen-activated protein kinase kinase kinase 2
PMS2L3	postmeiotic segregation increased 2-like 3; zinc finger protein 12
RFC2	replication factor C (activator 1) 2, 40kDa
RNF168	ring finger protein 168
PRKDC	similar to protein kinase, DNA-activated, catalytic polypeptide; protein kinase, DNA-activated, catalytic polypeptide
SIRT1	sirtuin (silent mating type information regulation 2 homolog) 1 (S. cerevisiae)
TOPBP1	topoisomerase (DNA) II binding protein 1
TLK1	tousled-like kinase 1
Apoptosis-related genes
EP300	E1A binding protein p300
FGD3	FYVE, RhoGEF and PH domain containing 3
GSPT1	G1 to S phase transition 1
MDM4	Mdm4 p53 binding protein homolog (mouse)
SLTM	SAFB-like, transcription modulator
SH3KBP1	SH3-domain kinase binding protein 1
AHR	aryl hydrocarbon receptor
BRCA1	breast cancer 1, early onset
CASP9	caspase 9, apoptosis-related cysteine peptidase
C16orf5	chromosome 16 open reading frame 5
FXR1	fragile X mental retardation, autosomal homolog 1
PPP3R1	protein phosphatase 3 (formerly 2B), regulatory subunit B, alpha isoform
RABEP1	rabaptin, RAB GTPase binding effector protein 1
SIRT1	sirtuin (silent mating type information regulation 2 homolog) 1 (S. cerevisiae)
Hemopoiesis-related genes
DCLRE1C	DNA cross-link repair 1C (PSO2 homolog, S. cerevisiae)
PRKDC	similar to protein kinase, DNA-activated, catalytic polypeptide; protein kinase, DNA-activated, catalytic polypeptide
TCEA1	transcription elongation factor A (SII), 1 pseudogene 2; transcription elongation factor A (SII), 1
